# Supplementary material for: Facile and economical synthesis of metal–organic framework MIL-100(Al) gels for high efficiency removal of microcystin-LR
Source: Royal Society of Chemistry journal article supplement (doi:10.1039/c3ra40741a), 2013-01-01
Supplement: c3ra40741a.pdf [file c3ra40741a.pdf]

## Electronic Supplementary Information for

Facile and economical synthesis of metal-organic framework  
MIL-100(Al) gels for high efficiency removal of  
Microcystin-LR

Wei Xia, Xiangmei Zhang, Ling Xu, Yingxia Wang, Jianhua Lin, and Ruqiang Zou\*

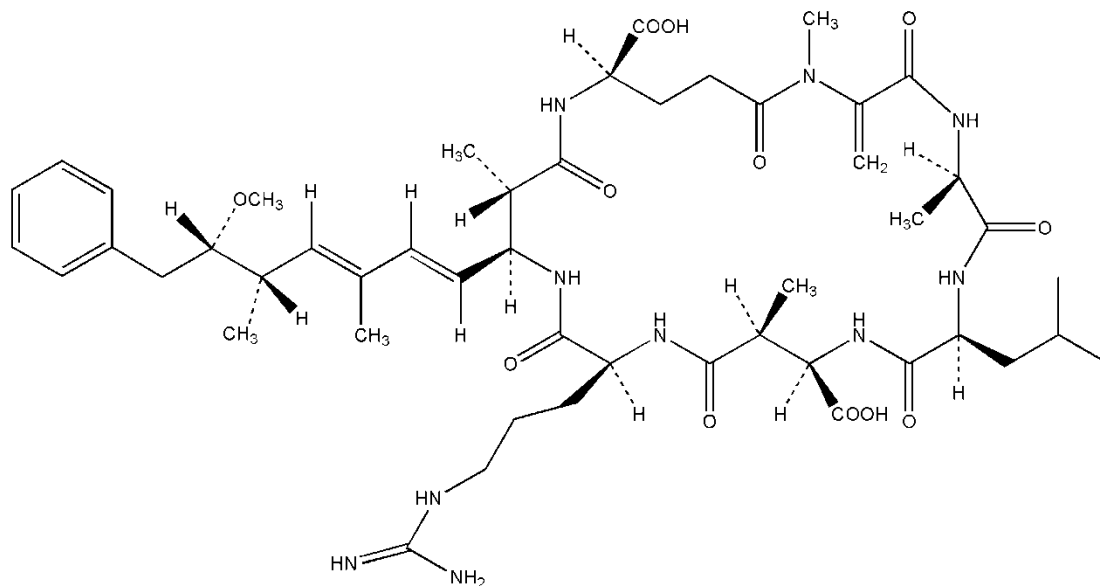

Fig. S1 The molecular structure of microcystin-LR. The longest molecular length is 1.9 nm.

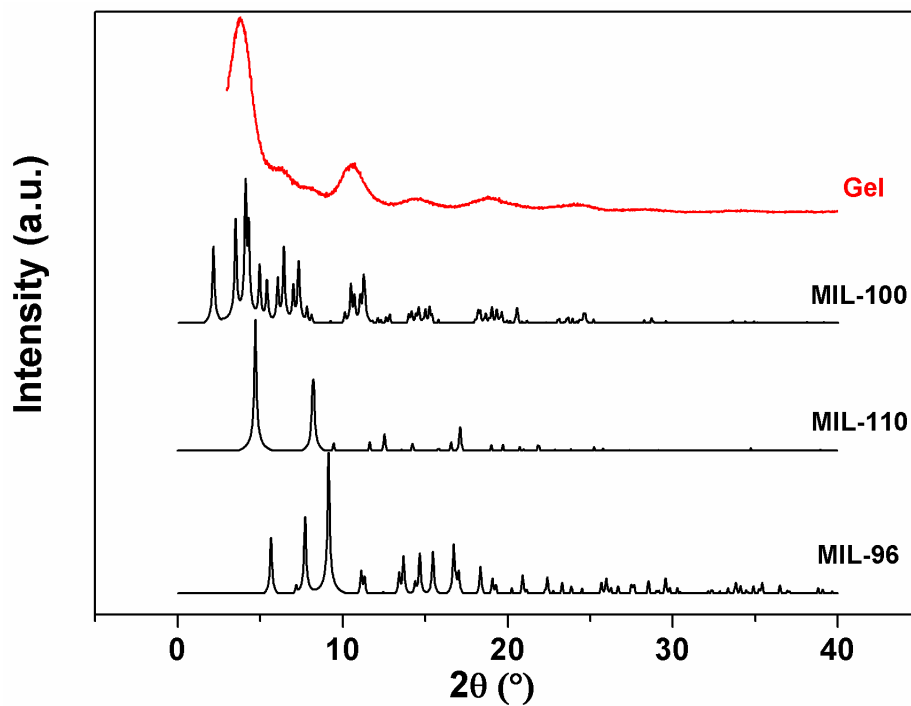

Fig. S2 PXR D pattern for the MIL-100(AI) gel sample and the simulated pattern from crystallographic information files of the MIL-100, MIL-110, MIL-96 crystals.

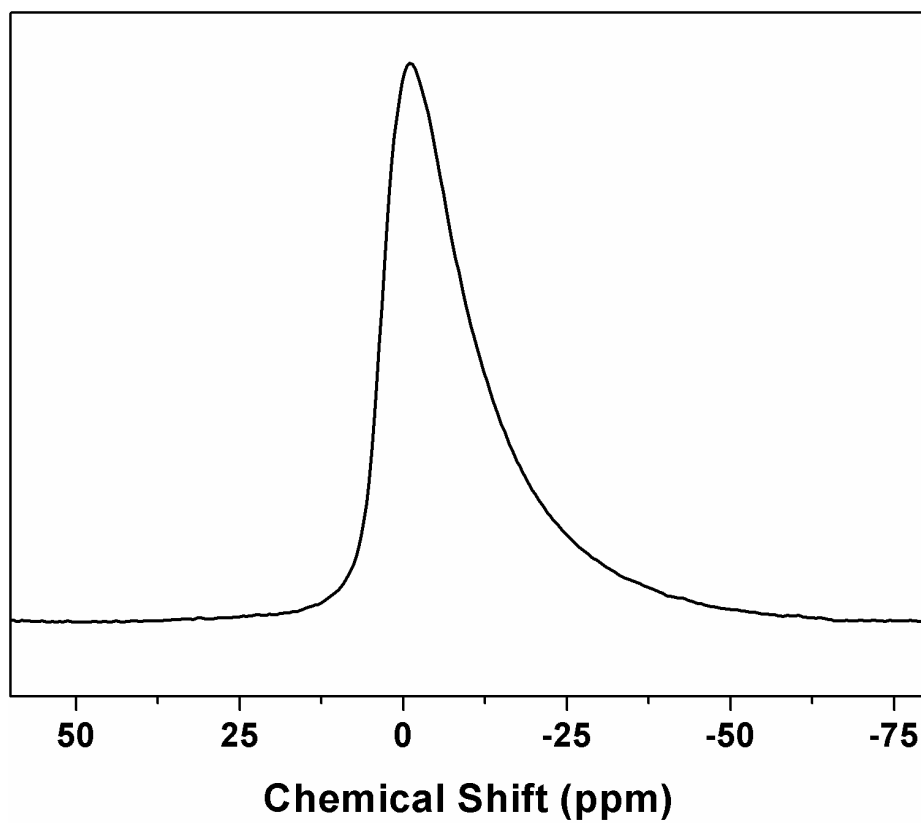

Fig. S3  $^{27}\text{Al}$  Solid State NMR spectrum of the MIL-100(Al) gel.

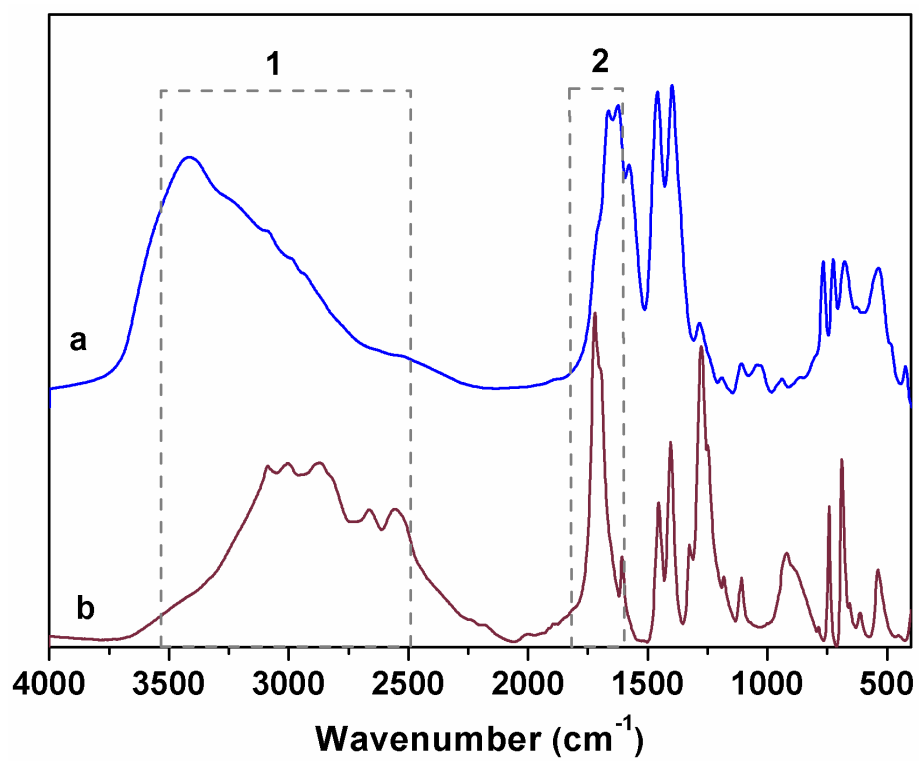

Fig. S4 FT-IR spectra of (a) activated MIL-100(Al) gel and (b) H<sub>3</sub>BTC ligand.

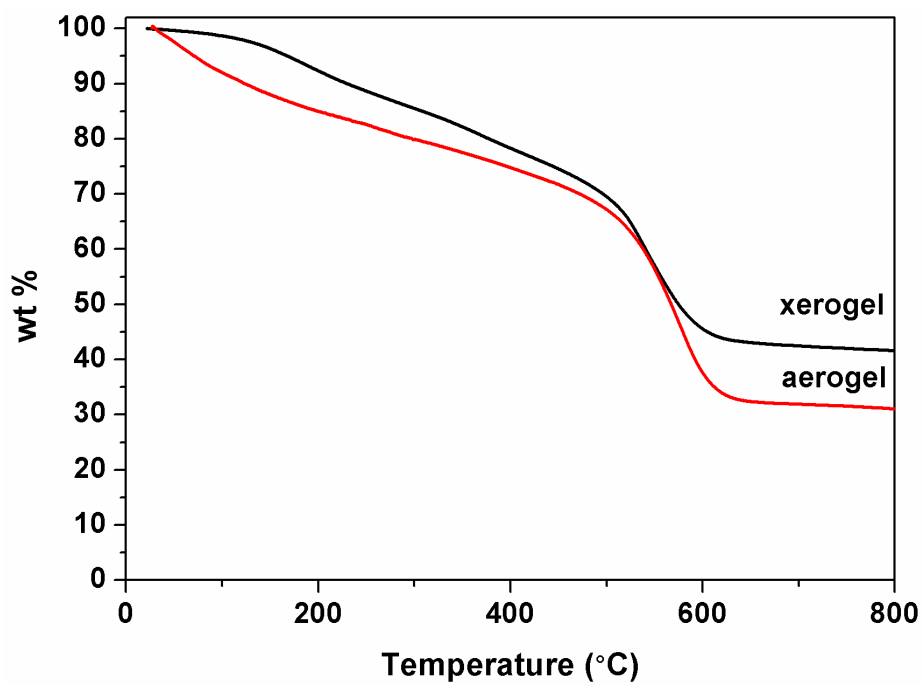

Fig. S5 Thermogravimetric analyses of the MIL-100(Al) xero- and aerogel samples in nitrogen atmosphere.

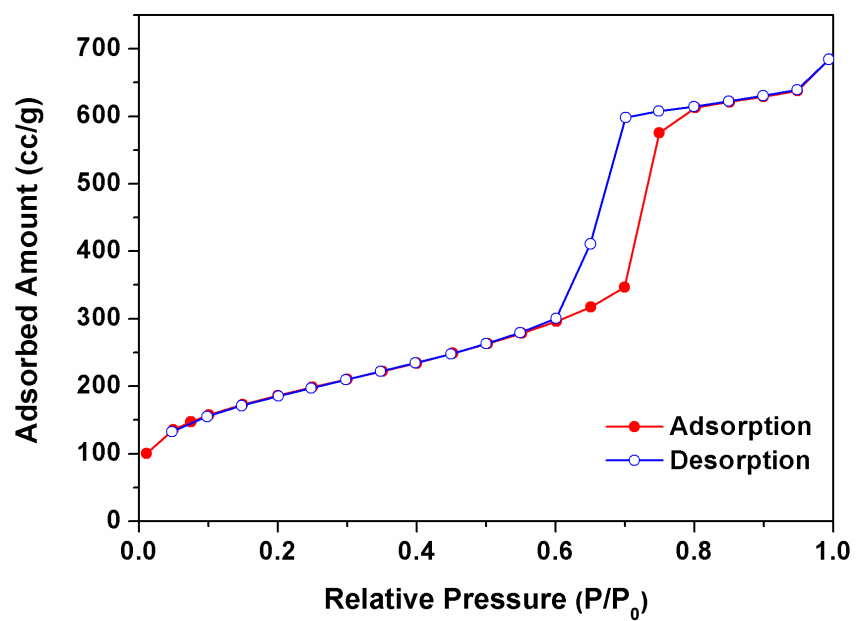

Fig. S6 N<sub>2</sub> sorption isotherms of SBA-15 zeolite used in this experiment revealing a BET surface area of 660 m<sup>2</sup>/g.

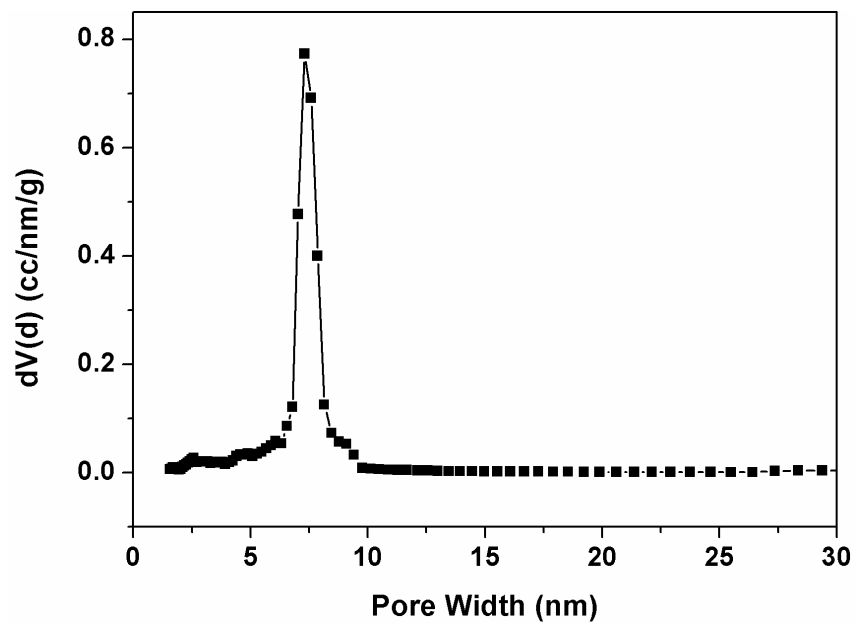

Fig. S7 Pore size distribution of the SBA-15 zeolite, which shows that the pore size is predominately around 7.5 nm.
